# Supplementary material for: Binding affinities of human IgG1 and chimerized pig and rabbit derivatives to human, pig and rabbit Fc gamma receptor IIIA
Source: PubMed Central journal article supplement (PMC6641210; doi:10.1371/journal.pone.0219999), 2019-07-19
Supplement: pone.0219999.s001.pdf [file pone.0219999.s001.pdf]

**S1 Table: Antibody constant region sequences**

| Protein             | IgG1 constant region | Fc effector function                          | Sequence                                                                                                                                                                                                                                                                                                                                                   | Sequence reference (Source)     |
|---------------------|----------------------|-----------------------------------------------|------------------------------------------------------------------------------------------------------------------------------------------------------------------------------------------------------------------------------------------------------------------------------------------------------------------------------------------------------------|---------------------------------|
| Human IgG1          | IgG1 heavy chain     | Wild-type                                     | ASTKGPSVFPLAPSSKSTSGGTAALGCLVKDYFPEPVTVSWNSGALTSGVHTFPAVLQSSGLYSLSSVVTVPSSSLGTQTYICNVNHKPSNTKVDKKVEPKSCDKTHTCPPCPAPELGGPSVFLFPPKPKDTLMISRTPEVTCVVDVSHEDPEVKFNWYVDGVEVHNAKTKPREEQYNSTYRVVSVLTVLHQDWLNGKEYKCKVSNKALPAPIEKTISKAKGQPREPQVYTLPPSREEMTKNQVSLTCLVKGFYPSDIAVEWESNGQPENNYKTPPVLDSDGSFFLYSKLTVDKSRWQQGNVFSCSVMHEALHNHYTQKSLSLSPGK                    | pfuse-hchg1 (Invivogen)         |
|                     | Kappa light chain    | N/A                                           | RTVAAPSVFIFPPSDEQLKSGTASVCLLNNFYPREAKVQWKVDNALQSGNSQESVTEQDSK DSTYLSSTLTLSKADYEKHKVYACEVTHQGLSSPVTKSFNRGEC                                                                                                                                                                                                                                                 | pfuse2-hclk (Invivogen)         |
| Human IgG1-SD/IE    | IgG1 heavy chain     | ADCC-enhanced, S239D/I332E (SD/IE)            | ASTKGPSVFPLAPSSKSTSGGTAALGCLVKDYFPEPVTVSWNSGALTSGVHTFPAVLQSSGLYSLSSVVTVPSSSLGTQTYICNVNHKPSNTKVDKKVEPKSCDKTHTCPPCPAPELGGP <u>D</u> VFLFPPKPKDTLMISRTPEVTCVVDVSHEDPEVKFNWYVDGVEVHNAKTKPREEQYNSTYRVVSVLTVLHQDWLNGKEYKCKVSNKALPAPIE <u>E</u> KTISKAKGQPREPQVYTLPPSREEMTKNQVSLTCLVKGFYPSDIAVEWESNGQPENNYKTPPVLDSDGSFFLYSKLTVDKSRWQQGNVFSCSVMHEALHNHYTQKSLSLSPGK | Lazar et al., 2006 (PNAS)       |
|                     | Kappa light chain    | N/A                                           | RTVAAPSVFIFPPSDEQLKSGTASVCLLNNFYPREAKVQWKVDNALQSGNSQESVTEQDSK DSTYLSSTLTLSKADYEKHKVYACEVTHQGLSSPVTKSFNRGEC                                                                                                                                                                                                                                                 | pfuse2-hclk (Invivogen)         |
| Human IgG1-LA/LA/PG | IgG1 heavy chain     | ADCC-attenuated, L234A/L235A/P329G (LA/LA/PG) | ASTKGPSVFPLAPSSKSTSGGTAALGCLVKDYFPEPVTVSWNSGALTSGVHTFPAVLQSSGLYSLSSVVTVPSSSLGTQTYICNVNHKPSNTKVDKKVEPKSCDKTHTCPPCPAPE <u>AA</u> GGPSVFLFPPKPKDTLMISRTPEVTCVVDVSHEDPEVKFNWYVDGVEVHNAKTKPREEQYNSTYRVVSVLTVLHQDWLNGKEYKCKVSNKALGAPIEKTISKAKGQPREPQVYTLPPSREEMTKNQVSLTCLVKGFYPSDIAVEWESNGQPENNYKTPPVLDSDGSFFLYSKLTVDKSRWQQGNVFSCSVMHEALHNHYTQKSLSLSPGK          | Schlothauer et al., 2016 (peds) |
|                     | Kappa light chain    | N/A                                           | RTVAAPSVFIFPPSDEQLKSGTASVCLLNNFYPREAKVQWKVDNALQSGNSQESVTEQDSK DSTYLSSTLTLSKADYEKHKVYACEVTHQGLSSPVTKSFNRGEC                                                                                                                                                                                                                                                 | pfuse2-hclk (Invivogen)         |
| Rabbit IgG          | IgG1 heavy chain     | Wild-type                                     | GQPKAPSVFPLAPCCGDTSPSTVTLGCLVKGYLPEPVTVTWNSGTLTNGVRTFPSVRQSSGLYSLSSVSVTSSSQPVTCNVAHPATNTKVDKTVAPSTCCKPTCPPPELLGGPSVFIFPPKPKDTLMISRTPEVTCVVDVSEDDPEVQFTWYINNEQVTRARPLREQQFNSTIRVVSTLPIAHEDWLRGKEFKCKVHNKALPAPIEKTISKARGQPLEPKVYTMGPPREELSSRSVSLTCMINGFYPSDISVEWEKNGKAEDNYKTPAVLSDGSYFLYKLSVPTSEWQRGDVFTCSVMHEALHNHYTQKSISRSPGK                              | L29172 (IMGT)                   |
|                     | Kappa light chain    | N/A                                           | RDPVAPSVLLFPPSKEELTTGTATIVCVANKFYPSDITVTWKVDGTTQQSGIENSKTPQSPEDNTYLSSTLSLTSQAQNSHSHVYTCVQGSASPIVQSFNRGDC                                                                                                                                                                                                                                                   | X00232 (IMGT)                   |
| Pig IgG             | IgG1 heavy chain     | Wild-type                                     | APKTAPS <sup>V</sup> YPLAPCGRDTSGPNVALGCLASSYFPEPVMTWNSGALTSGVHTFPSVLQPSGLYSLSSMVTVPASSLSSKSYTCNVNHPATTTKVDKRVGTKTKPPCPICPGCEVAGPSVFIFPPKPKDTLMISQTPEVTCVVDVSKAEVQFSWYVDGVEVHTAETRPKEEQFNSTYRVVSVLPIQHQDWLKGKEFKCKVNNVDLPAPITRTISKAIGQSREPQVYTLPPPAAEELSRSKVTVTCLVIGFYPPDIHVEWKSNGQPEPEGNYRTTPPQQDVGDTFFLYSKLAVDKARWDHGETFECAVMHEALHNHYTQKSISKTQGK         | AB699686 (IMGT)                 |
|                     | Kappa light chain    | N/A                                           | RADAKPSVFIFPPSKEQLETQTVSVVCLLNSFFPREVNVKWKVDG <sup>V</sup> VQSSGILDSVTEQDSK DSTYLSSTLSLPTSQYLSHNLVYSCVTHKTLASPLVKSFSRNECEA                                                                                                                                                                                                                                 | FP312898 (IMGT)                 |
