# Supplementary material for: Binding affinities of human IgG1 and chimerized pig and rabbit derivatives to human, pig and rabbit Fc gamma receptor IIIA
Source: PubMed Central journal article supplement (PMC6641210; doi:10.1371/journal.pone.0219999), 2019-07-19
Supplement: pone.0219999.s002.pdf [file pone.0219999.s002.pdf]

**S2 Table: Fc $\gamma$ R1IIIA sequences**

| <b>Protein</b>                                          | <b>Extracellular Domain sequence (signal sequence underlined)</b>                                                                                                                                                               | <b>Sequence reference</b>              |
|---------------------------------------------------------|---------------------------------------------------------------------------------------------------------------------------------------------------------------------------------------------------------------------------------|----------------------------------------|
| Human Fc $\gamma$ R1IIIA-F158<br>(Low affinity allele)  | <u>MWQLLLPTALLLLVSAGMRTEDLPKAVVFLEPQWYRVLEKDSVTLKCQGAYSPEDNSTQWFHNESLISSQAS</u><br>SYFIDAATVDDSGEYRCQTNLSTLSDPVQLEVHIGWLLLQAPRWVFKEEDPIHLRCHSWKNTALHKVTYLQNG<br>KGRKYFHHNSDFYIPKATLKDSGSYFCRGLFGSKNVSSETVNITITQGLAVSTISSFFPPGYQ | P08637 (Uniprot)                       |
| Human Fc $\gamma$ R1IIIA-V158<br>(High affinity allele) | <u>MWQLLLPTALLLLVSAGMRTEDLPKAVVFLEPQWYRVLEKDSVTLKCQGAYSPEDNSTQWFHNESLISSQAS</u><br>SYFIDAATVDDSGEYRCQTNLSTLSDPVQLEVHIGWLLLQAPRWVFKEEDPIHLRCHSWKNTALHKVTYLQNG<br>KGRKYFHHNSDFYIPKATLKDSGSYFCRGLVGSKNVSSETVNITITQGLAVSTISSFFPPGYQ | P08637,<br>dbSNP:rs396991<br>(Uniprot) |
| Rabbit Fc $\gamma$ R1IIIA                               | <u>MGQPLPPVALLLLVSASSRAADVPKALVLLDPPWASVLKDDHVTLKCQGLHPAGDNTTQWLHNGSLLSSQAP</u><br>AYTITAARAEDGGEYRCQTGLSSLSDPVQLHVHLGWLVLQAPRWVFQEGEPIQLRCHSWKNNKLHKVTYLQ<br>NGRGLRYFHQNSDLHIPEATRHNHSGSYFCRGLIGHHNMSETVTITVQGPANPVISSVLPWHQ   | XP_002715293.1<br>(Genbank)            |
| Pig Fc $\gamma$ R1IIIA                                  | <u>MWQLLSPTALLLLVSVPGTHAEDPPKSVVILDPPWDRLLLEKDSVTLKCQGAYPPRDDSTEWRWNGTLISNKA</u><br>SSYSITDATVGNSEYTCCKTGLSAQSDPLRLEVYKGWLLLQAPRWVQEGESIRLRCHTWKNITIQKVQYFQN<br>GMGKKFSHQNFYHIPNATLKDGGSYFCRGIKNYDLSSEPVKVTVQGSKSPSPILSFFLPWHQ  | Q28942 (Uniprot)                       |
