# Supplementary material for: Binding affinities of human IgG1 and chimerized pig and rabbit derivatives to human, pig and rabbit Fc gamma receptor IIIA
Source: PubMed Central journal article supplement (PMC6641210; doi:10.1371/journal.pone.0219999), 2019-07-19
Supplement: pone.0219999.s003.pdf [file pone.0219999.s003.pdf]

**S3 Table:** Kinetic parameters derived from 1:1 Langmuir binding model. Average of 3 replicates are reported with standard deviation in square brackets [SD]. Concentrations tested are listed in parentheses below each Fc $\gamma$ R111A. i.b., insufficient binding.

| Ligand         | Analyte<br>(Concentrations tested<br>in nM)                              | Capture<br>Amount<br>[SD]<br>(RU) | k <sub>a</sub> [SD]<br>(1/Ms) | k <sub>d</sub><br>[SD]<br>(1/s) | K <sub>D</sub> [SD]<br>(M) | R <sub>max</sub><br>[SD]<br>(RU) | Chi <sup>2</sup><br>(RU <sup>2</sup> ) | %<br>R <sub>max</sub><br>of<br>est.<br>R <sub>max</sub> |
|----------------|--------------------------------------------------------------------------|-----------------------------------|-------------------------------|---------------------------------|----------------------------|----------------------------------|----------------------------------------|---------------------------------------------------------|
| hIgG1          | <b>hFc<math>\gamma</math>R111A-V158</b><br>(15, 44, 132, 396, 1189)      | 150.0<br>[0.4]                    | 1.89E+06<br>[1.45E+06]        | 0.22<br>[0.17]                  | 1.20E-07<br>[3.08E-09]     | 28.77<br>[0.09]                  | 1.12                                   | 76%                                                     |
|                | <b>hFc<math>\gamma</math>R111A-F158</b><br>(44, 132, 396, 1189, 3568)    | 162.0<br>[9.7]                    | 2.66E+05<br>[3.31E+04]        | 0.16<br>[0.01]                  | 6.05E-07<br>[2.46E-08]     | 35.63<br>[0.79]                  | 2.72                                   | 87%                                                     |
|                | <b>pFc<math>\gamma</math>R111A</b><br>(502, 1507, 4520, 13560,<br>40680) | 132.4<br>[0.3]                    | 5.92E+03<br>[8.87E+02]        | 0.05<br>[0.00]                  | 8.06E-06<br>[1.81E-06]     | 19.87<br>[0.85]                  | 5.91                                   | 75%                                                     |
|                | <b>rFc<math>\gamma</math>R111A</b><br>(73, 220, 661, 1982, 5947)         | 169.8<br>[6.4]                    | 1.22E+05<br>[6.94E+03]        | 0.33<br>[0.00]                  | 2.71E-06<br>[1.34E-07]     | 30.81<br>[0.44]                  | 0.77                                   | 72%                                                     |
| hIgG1-SD/IE    | <b>hFc<math>\gamma</math>R111A-V158</b><br>(1.6, 4.9, 15, 44, 132)       | 158.6<br>[0.3]                    | 1.01E+07<br>[1.90E+05]        | 0.01<br>[0.00]                  | 1.18E-09<br>[1.06E-11]     | 30.07<br>[0.15]                  | 0.37                                   | 75%                                                     |
|                | <b>hFc<math>\gamma</math>R111A-F158</b><br>(1.6, 4.9, 15, 44, 132)       | 147.4<br>[8.1]                    | 1.16E+07<br>[2.11E+06]        | 0.05<br>[0.00]                  | 4.60E-09<br>[5.40E-10]     | 30.26<br>[0.18]                  | 0.83                                   | 81%                                                     |
|                | <b>pFc<math>\gamma</math>R111A</b><br>(56, 167, 502, 1507, 4520)         | 178.7<br>[0.5]                    | 4.80E+05<br>[1.06E+05]        | 0.35<br>[0.05]                  | 7.26E-07<br>[5.30E-08]     | 33.40<br>[0.61]                  | 1.78                                   | 94%                                                     |
|                | <b>rFc<math>\gamma</math>R111A</b><br>(8, 24, 73, 220, 661)              | 169.1<br>[0.5]                    | 1.80E+06<br>[5.14E+04]        | 0.27<br>[0.01]                  | 1.48E-07<br>[3.20E-09]     | 29.85<br>[0.22]                  | 0.34                                   | 70%                                                     |
| hIgG1-LA/LA/PG | <b>hFc<math>\gamma</math>R111A-V158</b><br>(1189, 3568, 10705)           | 177.4<br>[5.7]                    | i.b.                          | i.b.                            | i.b.                       | 9.57                             | i.b.                                   | 21%                                                     |
|                | <b>hFc<math>\gamma</math>R111A-F158</b><br>(1189, 3568, 10705)           | 177.4<br>[5.7]                    | i.b.                          | i.b.                            | i.b.                       | 11.23                            | i.b.                                   | 25%                                                     |
|                | <b>pFc<math>\gamma</math>R111A</b><br>(4520, 13560, 40680)               | 467.8<br>[0.4]                    | i.b.                          | i.b.                            | i.b.                       | 10.46                            | i.b.                                   | 11%                                                     |
|                | <b>rFc<math>\gamma</math>R111A</b><br>(1189, 3568, 10705)                | 177.4<br>[5.7]                    | i.b.                          | i.b.                            | i.b.                       | 6.88                             | i.b.                                   | 15%                                                     |
| pIgG1          | <b>hFc<math>\gamma</math>R111A-V158</b><br>(1189, 3568, 10705)           | 139.4<br>[0.5]                    | i.b.                          | i.b.                            | i.b.                       | 14.84                            | i.b.                                   | 42%                                                     |
|                | <b>hFc<math>\gamma</math>R111A-F158</b><br>(1189, 3568, 10705)           | 139.4<br>[0.5]                    | i.b.                          | i.b.                            | i.b.                       | 12.08                            | i.b.                                   | 34%                                                     |
|                | <b>pFc<math>\gamma</math>R111A</b><br>(167, 502, 1507, 4520,<br>13560)   | 155.8<br>[3.8]                    | 5.97E+04<br>[3.63E+03]        | 0.28<br>[0.01]                  | 4.73E-06<br>[1.96E-07]     | 27.01<br>[0.24]                  | 1.33                                   | 87%                                                     |
|                | <b>rFc<math>\gamma</math>R111A</b><br>(1189, 3568, 10705)                | 139.4<br>[0.5]                    | i.b.                          | i.b.                            | i.b.                       | 7.60                             | i.b.                                   | 22%                                                     |
| rIgG           | <b>hFc<math>\gamma</math>R111A-V158</b><br>(15, 44, 132, 396, 1189)      | 144.5<br>[0.3]                    | 1.44E+06<br>[5.31E+05]        | 0.26<br>[0.09]                  | 1.81E-07<br>[6.84E-09]     | 28.98<br>[0.20]                  | 1.60                                   | 79%                                                     |
|                | <b>hFc<math>\gamma</math>R111A-F158</b><br>(44, 132, 396, 1189, 3568)    | 137.9<br>[0.5]                    | 1.86E+05<br>[2.51E+03]        | 0.14<br>[0.01]                  | 7.73E-07<br>[6.82E-08]     | 30.67<br>[0.54]                  | 2.57                                   | 88%                                                     |
|                | <b>pFc<math>\gamma</math>R111A</b><br>(502, 1507, 4520, 13560,<br>40680) | 137.9<br>[0.5]                    | 7.11E+03<br>[5.06E+02]        | 0.08<br>[0.00]                  | 1.09E-05<br>[1.18E-06]     | 28.53<br>[1.04]                  | 5.36                                   | 104%                                                    |
|                | <b>rFc<math>\gamma</math>R111A</b><br>(73, 220, 661, 1982, 5947)         | 156.2<br>[0.4]                    | 1.40E+05<br>[5.57E+03]        | 0.34<br>[0.02]                  | 2.45E-06<br>[2.49E-08]     | 31.79<br>[0.10]                  | 1.27                                   | 80%                                                     |
