# Supplementary material for: Binding affinities of human IgG1 and chimerized pig and rabbit derivatives to human, pig and rabbit Fc gamma receptor IIIA
Source: PubMed Central journal article supplement (PMC6641210; doi:10.1371/journal.pone.0219999), 2019-07-19
Supplement: pone.0219999.s004.pdf [file pone.0219999.s004.pdf]

**S4 Table:** Affinity values derived from steady-state binding analysis. Average of 3 replicates are reported with standard deviation in square brackets [SD]. Concentrations tested are listed in parenthesis below each FcγRIIIA.

| Ligand      | Analyte<br>(Concentrations tested in nM)               | Capture<br>Amount [SD]<br>(RU) | K <sub>D</sub> [SD]<br>(M) | R <sub>max</sub><br>[SD]<br>(RU) | Chi <sup>2</sup><br>(RU <sup>2</sup> ) | % R <sub>max</sub> of<br>est. R <sub>max</sub> |
|-------------|--------------------------------------------------------|--------------------------------|----------------------------|----------------------------------|----------------------------------------|------------------------------------------------|
| hIgG1       | <b>hFcγRIIIA-V158</b><br>(15, 44, 132, 396, 1189)      | 150.0 [0.4]                    | 1.23E-07<br>[5.52E-10]     | 29.46<br>[0.12]                  | 0.53                                   | 78%                                            |
|             | <b>hFcγRIIIA-F158</b><br>(44, 132, 396, 1189, 3568)    | 162.0 [9.7]                    | 6.12E-07<br>[5.49E-08]     | 37.13<br>[1.45]                  | 0.26                                   | 90%                                            |
|             | <b>pFcγRIIIA</b><br>(502, 1507, 4520, 13560,<br>40680) | 132.4 [0.3]                    | 1.47E-05<br>[3.14E-06]     | 25.11<br>[1.38]                  | 1.21                                   | 95%                                            |
|             | <b>rFcγRIIIA</b><br>(73, 220, 661, 1982, 5947)         | 169.8 [6.4]                    | 2.17E-06<br>[3.18E-08]     | 28.73<br>[0.19]                  | 0.15                                   | 67%                                            |
| hIgG1-SD/IE | <b>pFcγRIIIA</b><br>(56, 167, 502, 1507, 4520)         | 178.7 [0.5]                    | 6.38E-07<br>[1.95E-08]     | 33.35<br>[0.32]                  | 0.11                                   | 94%                                            |
|             | <b>rFcγRIIIA</b><br>(8, 24, 73, 220, 661)              | 169.1 [0.5]                    | 1.33E-07<br>[3.93E-09]     | 29.26<br>[0.38]                  | 0.13                                   | 68%                                            |
| pIgG1       | <b>pFcγRIIIA</b><br>(167, 502, 1507, 4520, 13560)      | 155.8 [3.8]                    | 3.97E-06<br>[1.22E-07]     | 26.64<br>[0.20]                  | 0.07                                   | 86%                                            |
| rIgG        | <b>hFcγRIIIA-V158</b><br>(15, 44, 132, 396, 1189)      | 144.5 [0.3]                    | 1.72E-07<br>[4.11E-09]     | 29.32<br>[0.17]                  | 0.39                                   | 80%                                            |
|             | <b>hFcγRIIIA-F158</b><br>(44, 132, 396, 1189, 3568)    | 137.9 [0.5]                    | 7.92E-07<br>[4.65E-08]     | 32.40<br>[0.08]                  | 0.08                                   | 93%                                            |
|             | <b>pFcγRIIIA</b><br>(502, 1507, 4520, 13560,<br>40680) | 137.9 [0.5]                    | 1.32E-05<br>[7.65E-07]     | 31.91<br>[0.49]                  | 0.76                                   | 116%                                           |
|             | <b>rFcγRIIIA</b><br>(73, 220, 661, 1982, 5947)         | 156.2 [0.4]                    | 1.99E-06<br>[4.01E-08]     | 30.05<br>[0.16]                  | 0.04                                   | 76%                                            |
