# Supplementary material for: Binding affinities of human IgG1 and chimerized pig and rabbit derivatives to human, pig and rabbit Fc gamma receptor IIIA
Source: PubMed Central journal article supplement (PMC6641210; doi:10.1371/journal.pone.0219999), 2019-07-19
Supplement: pone.0219999.s005.pdf [file pone.0219999.s005.pdf]

# S1 Fig

**A**

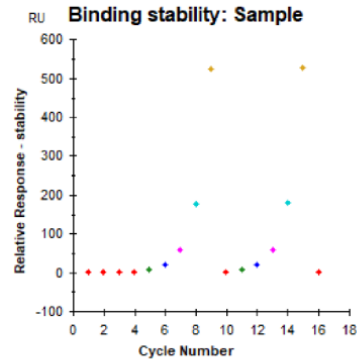

| hIgG1 Concentration (nM) | Average Relative Response (RU) | % CV |
|--------------------------|--------------------------------|------|
| 0                        | -1.0                           | 16%  |
| 0.2                      | 5.4                            | 1.4% |
| 0.6                      | 18.3                           | 1.7% |
| 1.8                      | 58.2                           | 0.6% |
| 5.3                      | 176.7                          | 0.8% |
| 16.2                     | 523.4                          | 0.2% |

**B**

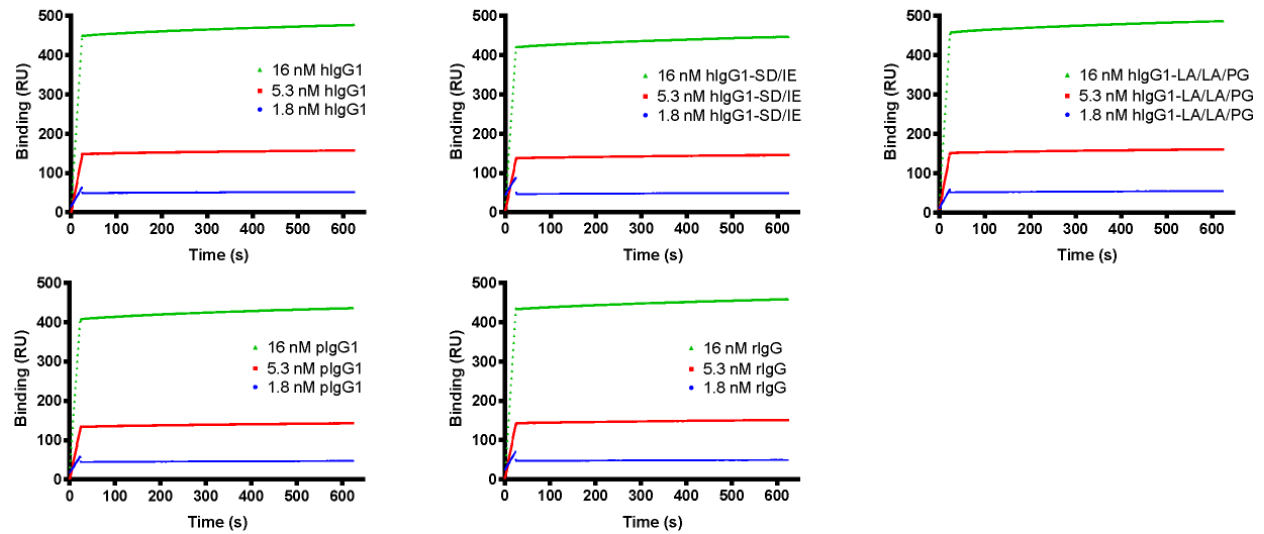

**C**

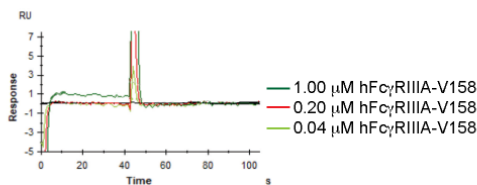

**S1 Fig:** Characterization of Protein L sensor chip **A**, Binding stability of capture on flow cell (FC) 2 at different concentrations of hlgG1 with regeneration between each cycle. Relative response (i.e. FC1 response subtracted from FC2 response) plotted against cycle number. The average relative response and % coefficient of variation (CV) of two replicates is reported for non-zero concentrations of hlgG1. Buffer control (hlgG1 = 0) average is determined from 6 injections. **B**, Capture of hlgG1, hlgG1-SD/IE, hlgG1-LA/LA/PG, plgG1, and rlgG to Protein L surface by injection onto the FC2 surface for 24 s and dissociation for 600 s. **C**, Lack of nonspecific interaction between hFcγRIIIA-V158 and Protein L surface performed at a flow rate of 30  $\mu\text{l}/\text{min}$ , with association for 45 s and dissociation for 60 s.
