# Supplementary material for: Binding affinities of human IgG1 and chimerized pig and rabbit derivatives to human, pig and rabbit Fc gamma receptor IIIA
Source: PubMed Central journal article supplement (PMC6641210; doi:10.1371/journal.pone.0219999), 2019-07-19
Supplement: pone.0219999.s006.pdf [file pone.0219999.s006.pdf]

## S2 Fig

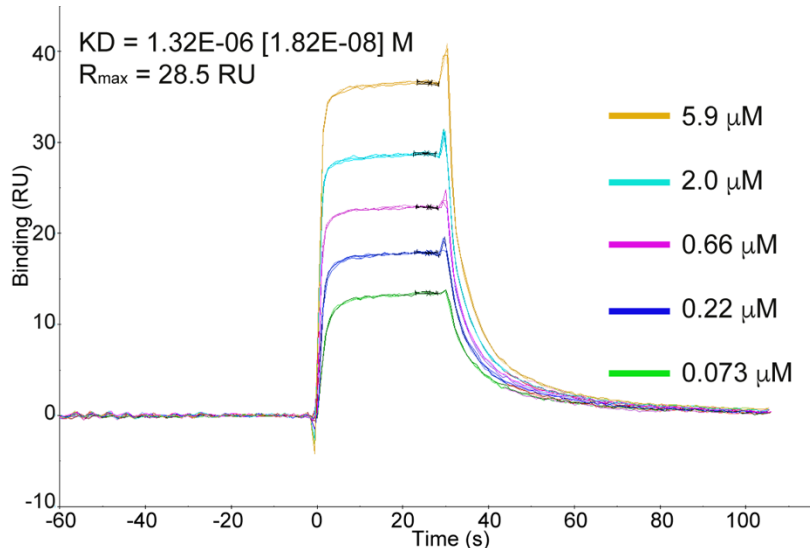

**S2 Fig:** Steady-state affinity of rabbit IgG to rabbit Fc $\gamma$ RIIIA using SA sensor chip. Rabbit Fc $\gamma$ RIIIA was injected over the surface for 30 s at concentrations listed on the right-hand side of the sensorgrams and allowed to dissociate for 60 s. Curves shown are double-referenced from buffer injections and a reference surface. Report points used for steady-state affinity analysis are indicated with black x's on curves and the average of three K<sub>D</sub> measurements is shown in the left-top corner with standard deviation in square brackets.
