# Supplementary material for: Binding affinities of human IgG1 and chimerized pig and rabbit derivatives to human, pig and rabbit Fc gamma receptor IIIA
Source: PubMed Central journal article supplement (PMC6641210; doi:10.1371/journal.pone.0219999), 2019-07-19
Supplement: pone.0219999.s007.pdf [file pone.0219999.s007.pdf]

**S3 Fig:** Clustal Omega alignment of hlgG1, rlgG, and plgG1 heavy chain (A) and light chain (B) constant regions with constant region numbering based on the human heavy and light chains. An asterisk (\*) indicates a fully conserved residue, a colon (:) indicates strong similarity between residues, and a period (.) indicates weakly similar properties between residues. Bold and underlined, contact interface with Fc region of hlgG1<sup>1</sup>. Contact interface residues conserved in rabbit and pig also bold and underlined.

**A. IgG1 heavy chain Clustal Omega Alignment:**

|        |                                                                                                                 |     |
|--------|-----------------------------------------------------------------------------------------------------------------|-----|
| human  | ASTKGPSVFPLAPSSKSTSGGTAALGCLVKDYFPEPVTVSWNSGALTSGVHTFPAVLQSS                                                    | 177 |
| rabbit | GQPKAPSVFPLAPCCGDTSPSTVTLGCLVKGYLPEPVTVTWNSGTLTNGVRTFPSVRQSS                                                    | 177 |
| pig    | APKTAPSVYPLAPCGRDTS GPNVALGCLASSYFPEPVTMTWNSGALTSGVHTFPSVLQPS                                                   | 177 |
|        | . . .***:***. . * . . :***...*:*****:*****:***.***:***: * * *                                                   |     |
| human  | GLYSLSSVVTVPSSSLGTQTYICNVNHKPSNTKVDKKVEPKSCDKTHTCPPCPAPE <b><u>LLGG</u></b>                                     | 237 |
| rabbit | GLYSLSSVVSVTSS---SQPVTCNVAHPATNTKVDKTVPASTCSK----PTCPPPE <b><u>LLGG</u></b>                                     | 237 |
| pig    | GLYSLSSMVTVPASSLSKSYTCNVNHPATTTKVDKRVGTKTKPP---CPICPGCE- <b><u>VAG</u></b>                                      | 237 |
|        | *****:***: * : * : * * * :***** * . : * * * * :.*                                                               |     |
| human  | <b><u>PS</u></b> VF LFPKPKD TLMI SRTP EVCV VVDV SHEDPEVKF <b><u>NWYVD</u></b> GVEVHNAKTKPREEQ <b><u>YN</u></b>  | 297 |
| rabbit | <b><u>PS</u></b> VF IFPPKPKD TLMI SRTP EVCV VVDV SEDDPEVQ <b><u>FTWY</u></b> INNEQV RTARPPLE <b><u>QQFN</u></b> | 297 |
| pig    | <b><u>PS</u></b> VF IFPPKPKD TLMI SQTP EVCV VVDV SKEHAEVQ <b><u>FSWYVD</u></b> GVEVHTAETRPKEE <b><u>QFN</u></b> | 297 |
|        | ***:*****:*****:*****:.. *:***:.. : :*. . :*:*:*                                                                |     |
| human  | <b><u>ST</u></b> YRVVSVLTVLHQD WLN GKEYKCKVSNKAL <b><u>P</u></b> API EKTISKAKGQPREPQVYTLPPSREE                  | 357 |
| rabbit | <b><u>ST</u></b> IRVVS TLPIAHEDWLRGKEFKCKVHNKAL <b><u>P</u></b> API EKTISKARGQPLEPKVYTMGPPREE                   | 357 |
| pig    | <b><u>ST</u></b> YRVVSVLPIQH QDWLKGKEFKCKVNNVDL <b><u>P</u></b> API TRTISKAI GQSREPQVYTLPPPAEE                  | 357 |
|        | ** * ** * . * : * : * * . * * : * * * * * * * * * * * * * * * * * * * *                                         |     |
| human  | MTKNQVSLTCLVKGFYPSDIAVEWESNGQP--ENNYKTTTPVLDS DGSFFLYSKLTVDKS                                                   | 415 |
| rabbit | LSSRSVSLTCMINGFYPSDISVEWEKNGKA--EDNYKTTPAVLDS DGSYFLYKLSVPTS                                                    | 415 |
| pig    | LSRSKVTVTCLVIGFYPPDIHVEWKSNGQPEPEGNRYRTTPPQQD VDGTFFLYKLAVDKA                                                   | 415 |
|        | :: .*:***: * * * * * : * * * * * * * * * * * * * * * * * * * * * * * *                                          |     |
| human  | RWQQGNVFSCSV MHEALHNHYTQKSLSLSPGK                                                                               | 447 |
| rabbit | EWQRGDVFTCSVMHEALHNHYTQKSI SRSPGK                                                                               | 447 |
| pig    | RWDHGETFECAVMHEALHNHYTQKSI SKTQ GK                                                                              | 447 |
|        | .*:***: * * * * * * * * * * * * * * * * * * * * * * * *                                                         |     |

**B. Kappa light chain constant region:**

|        |                                                                                              |     |
|--------|----------------------------------------------------------------------------------------------|-----|
| human  | RTVAAPSVFIFPPSDEQLKSGTASVVC LLNMFYPREAKVQWKVDNALQSGNSQESVTEQD                                | 167 |
| rabbit | RDPVAPSVLLFPPSKEELTTGTATIVCVANKFYPSDITV TWKVDGTTQQSGIENSKTPQS                                | 167 |
| pig    | RADAKPSVFIFPPSKEQLETQTVSVVCLLN SFPREVNVKWKVDGVVQSSGILDSVTEQD                                 | 167 |
|        | * . ***:***.***: * * * * * : * * * * * : * * * * * : * * * * * . * * * * . * * * * . * * * * |     |
| human  | SKDSTYLSSTLTL SKADY EKHKVYACEVTHQGLSSP <b><u>V</u></b> TKSFNRGEC--                           | 214 |
| rabbit | PEDNTYLSSTLSL TSAQYN SHSVYTCEVV--QGSASPIVQSFNRGDC--                                          | 214 |
| pig    | SKDSTYLSSTLSL P TSOYLSHNLYSCEVTHKTLASPLVKSF SRNECEA                                          | 214 |
|        | :*.*****: * . : * * . * : * * * * * : * * * * * . * * * * . * * * *                          |     |
