# Supplementary material for: Binding affinities of human IgG1 and chimerized pig and rabbit derivatives to human, pig and rabbit Fc gamma receptor IIIA
Source: PLoS One. 2019 Jul 19;14(7):e0219999. doi: 10.1371/journal.pone.0219999 (PMC6641210; doi:10.1371/journal.pone.0219999)
Supplement: S4 Fig — (PDF) [file pone.0219999.s008.pdf]

**S4 Fig:** Clustal Omega alignment of hFcγRIIIA-V158, pFcγRIIIA, and rFcγRIIIA ECD fragments. An asterisk (\*) indicates a fully conserved residue, a colon (:) indicates strong similarity between residues, and a period (.) indicates weakly similar properties between residues. Bold and underlined, contact interface of hFcγRIIIA-V158 with Fc region of hlgG1<sup>1</sup>, using alternate numbering for hFcγRIIIA-V158<sup>2</sup>. Contact interface amino acids conserved in rabbit and pig also bold and underlined. Note that Asp129 in hFcγRIIIB is Gly129 in hFcγRIIIA, rFcγRIIIA and pFcγRIIIA<sup>2</sup>. Bold, N-linked glycosylation sites reported in hFcγRIIIA.

|                |                                                                                                                                                                  |     |
|----------------|------------------------------------------------------------------------------------------------------------------------------------------------------------------|-----|
| hFcγRIIIA-V158 | RTEDLPKAVVFLEPQWYRVLEKDSVTLKCQGAYSPED <b>N</b> STQ                                                                                                               | 41  |
| rFcγRIIIA      | RAADVPKALVLLDPPWASVLKDDHVTLCQGLHPAGD <b>N</b> TTQ                                                                                                                | 41  |
| pFcγRIIIA      | HAEDPPKSVVILDPPWDRLLLEKDSVTLKCQGAYPPRDDSTE                                                                                                                       | 41  |
|                | :: * **:***:* * :*:.* ***** : *:::                                                                                                                               |     |
| hFcγRIIIA-V158 | WFH <b>N</b> ESLISSQASSYFIDAATVDDSGEYRCQT <b>N</b> LSTLSDPVQLEVH <b>I</b> GWLLLQAPRWVFK                                                                          | 101 |
| rFcγRIIIA      | WLHNGSLLSSQAPAYTITAARAEDGGEYRCQTGLSSLSDPVQLHVHL <b>G</b> WLVLQAPRWVFQ                                                                                            | 101 |
| pFcγRIIIA      | WRWNGTLISNKASSYSITDATVGNSGEYTCKTGLSAQSDPLRLEVYK <b>G</b> WLLLQAPRWVQ                                                                                             | 101 |
|                | * * :*:.*:* * * . :.*** *:*.** :***:*.*: ***:*****.:                                                                                                             |     |
| hFcγRIIIA-V158 | EEDPIHLRCHS <b>W</b> K <b>N</b> TAL <b>H</b> K <b>V</b> TYLQNGK <b>G</b> R <b>K</b> Y <b>F</b> H <b>H</b> NSDFYIPKATLKDSGSYFC <b>R</b> GL <b>V</b> G <b>S</b> K  | 161 |
| rFcγRIIIA      | EGEPIQLRCHS <b>W</b> K <b>N</b> NKL <b>H</b> K <b>V</b> TYLQNGR <b>G</b> L <b>R</b> Y <b>F</b> H <b>Q</b> NSDLHIPEATRHNHSGSYFC <b>R</b> GL <b>I</b> G <b>H</b> H | 161 |
| pFcγRIIIA      | EGESIRLRCHT <b>W</b> K <b>N</b> IT <b>I</b> Q <b>K</b> VQYFQNGM <b>G</b> K <b>K</b> F <b>S</b> HQNFYHIPNATLKDGGSYFC <b>R</b> G <b>I</b> I <b>K</b> NY            | 161 |
|                | * : *::***:*** :*:** *:*** * ::*:.* : :*:.* :..*****::                                                                                                           |     |
| hFcγRIIIA-V158 | <b>N</b> VSSETV <b>N</b> ITITQGLAVSTISSFFPPGYQ                                                                                                                   | 190 |
| rFcγRIIIA      | <b>N</b> MSSETVTITVQGPANP-VISSSVLPWHQ                                                                                                                            | 190 |
| pFcγRIIIA      | DLSSEPVKVTVQGSKSPSPILSFFLPWHQ                                                                                                                                    | 190 |
|                | ::*** *.::: * * . * :*                                                                                                                                           |     |

## References

1. Sonderrmann P, Huber R, Oosthuizen V, Jacob U. The 3.2-A crystal structure of the human IgG1 Fc fragment-Fc gammaRIII complex. *Nature*. 2000;406(6793):267-273.
2. Radaev S, Motyka S, Fridman WH, Sautes-Fridman C, Sun PD. The structure of a human type III Fc gamma receptor in complex with Fc. *J Biol Chem*. 2001;276(19):16469-16477.
